# Supplementary material
Source: publisher figshare collection journal article supplement (https://acs.figshare.com/ndownloader/files/4113427)
Supplement: Supplementary file 1 [file 4113427]

Supporting Information for:

**Determining electron spin-transfer mechanisms in paramagnetic Ba<sub>2</sub>YMO<sub>6</sub> (M = Mo,**

**Re, Ru) double perovskites by <sup>89</sup>Y and <sup>137</sup>Ba MAS NMR spectroscopy**

Vladimir K. Michaelis<sup>1†</sup>, Brandon J. Greer<sup>1</sup>, Tomoko Aharen<sup>2†</sup>, John E. Greedan<sup>2</sup> and Scott Kroeker<sup>1\*</sup>

<sup>1</sup>*Department of Chemistry, University of Manitoba, Winnipeg, Manitoba, R3T 2N2 Canada*

<sup>2</sup>*Department of Chemistry, McMaster University, Hamilton, Ontario, L8S 4M1, Canada*

\*To whom correspondence should be addressed:

Scott Kroeker

Department of Chemistry

University of Manitoba

Winnipeg, Manitoba

R3T 2N2

Canada

Tel: 204-474-9335

Fax: 204-474-7608

E-mail: [Scott\\_Kroeker@UManitoba.ca](mailto:Scott_Kroeker@UManitoba.ca)

<sup>‡</sup>Current address: Francis Bitter Magnet Laboratory and Department of Chemistry, Massachusetts

Institute of Technology, Cambridge, MA, 02139, USA

<sup>†</sup>Current address: Dept. of Chemistry, University of Ottawa, Ottawa, ON, K1N 6N5, Canada

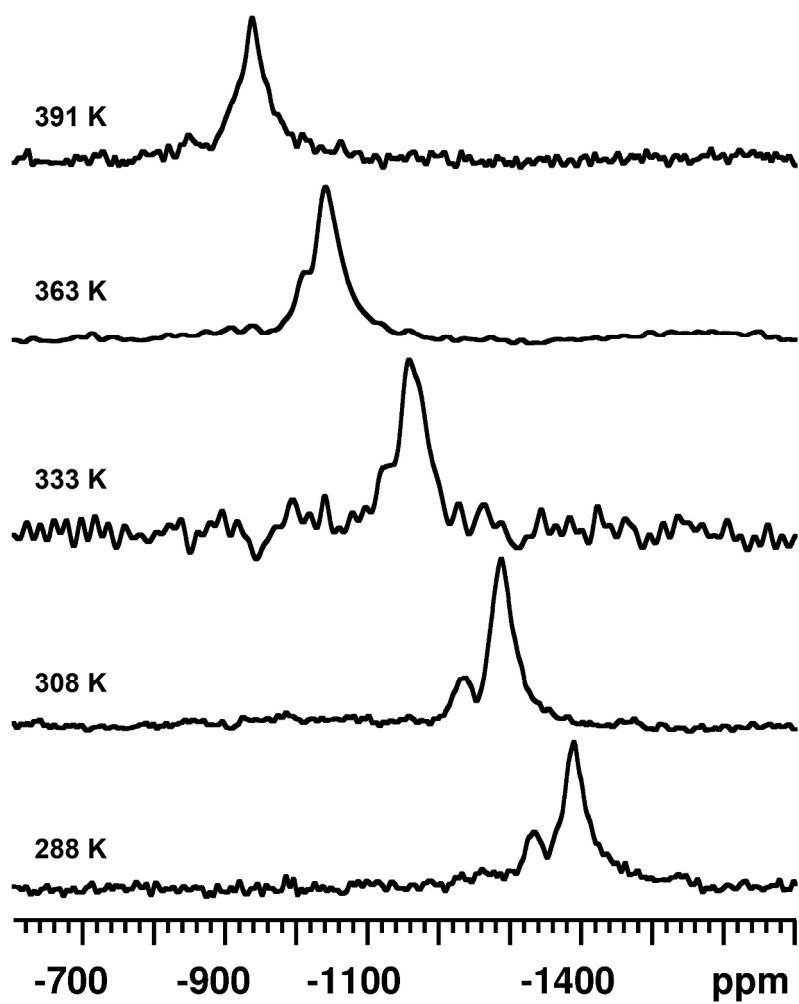

**Figure S1.**  $^{89}\text{Y}$  MAS NMR of  $\text{Ba}_2\text{YMoO}_6$  double perovskite ranging in temperature from 288 K to 391 K.

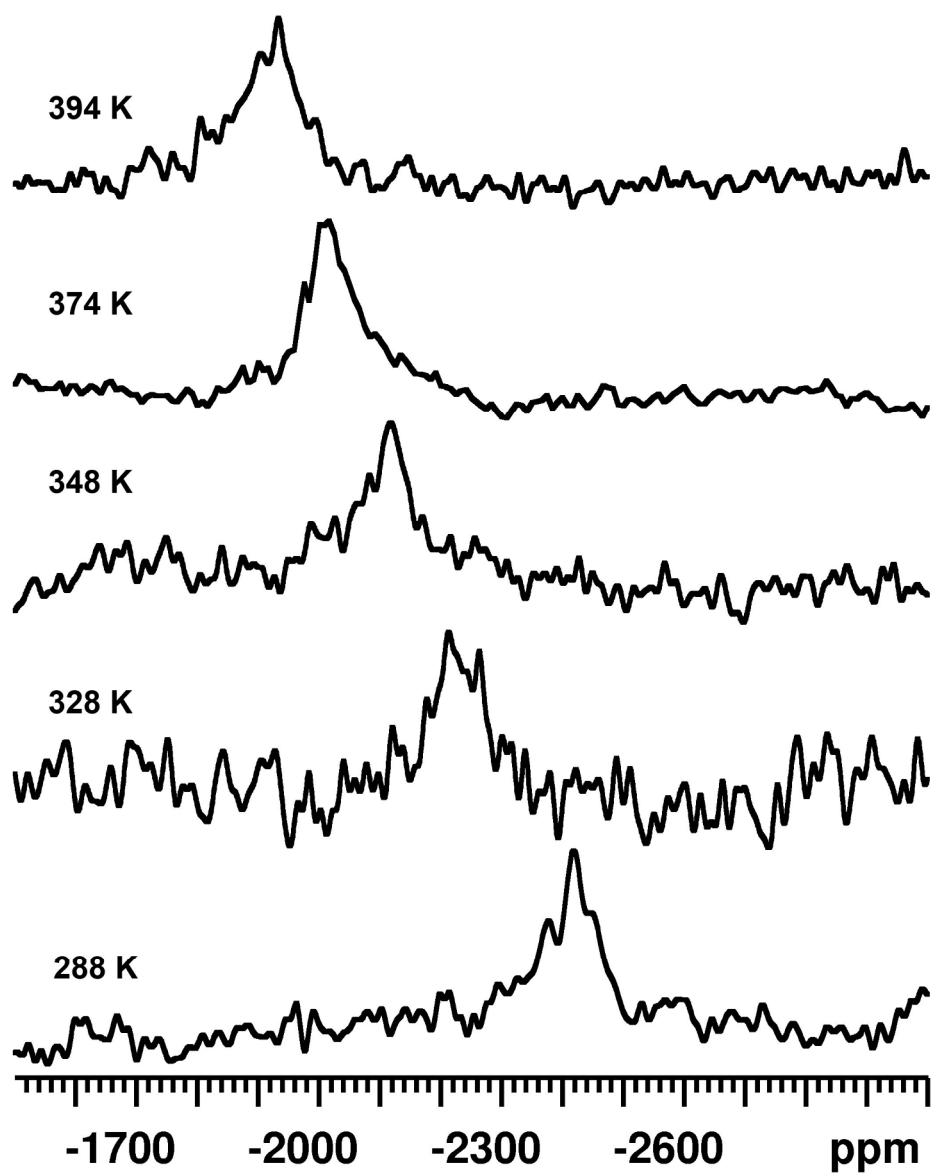

**Figure S2.**  $^{89}\text{Y}$  MAS NMR of  $\text{Ba}_2\text{YReO}_6$  double perovskite ranging in temperature from 288 K to 394 K.

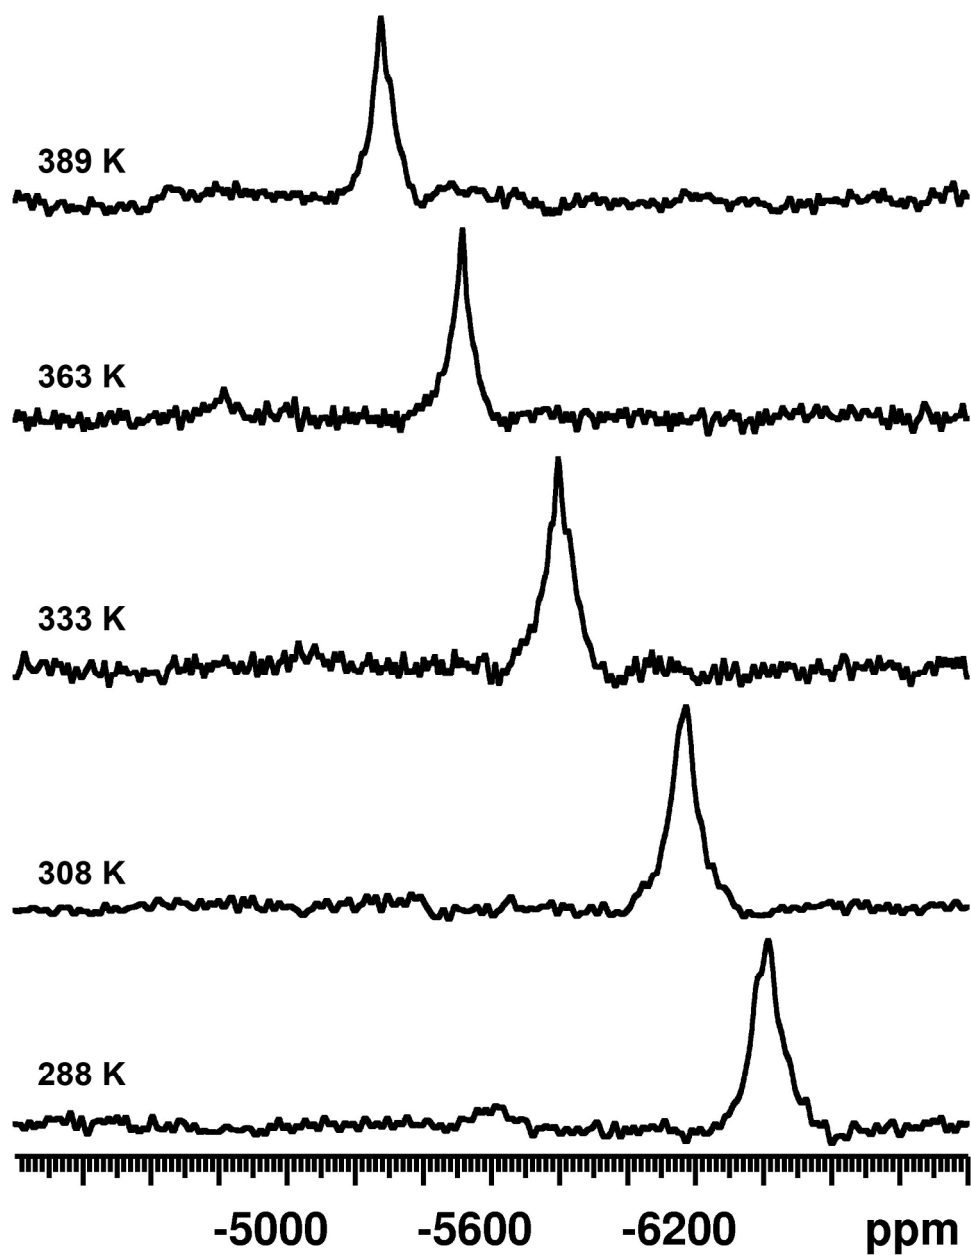

**Figure S3.**  $^{89}\text{Y}$  MAS NMR of  $\text{Ba}_2\text{YRuO}_6$  double perovskite ranging in temperature from 288 K to 389 K.

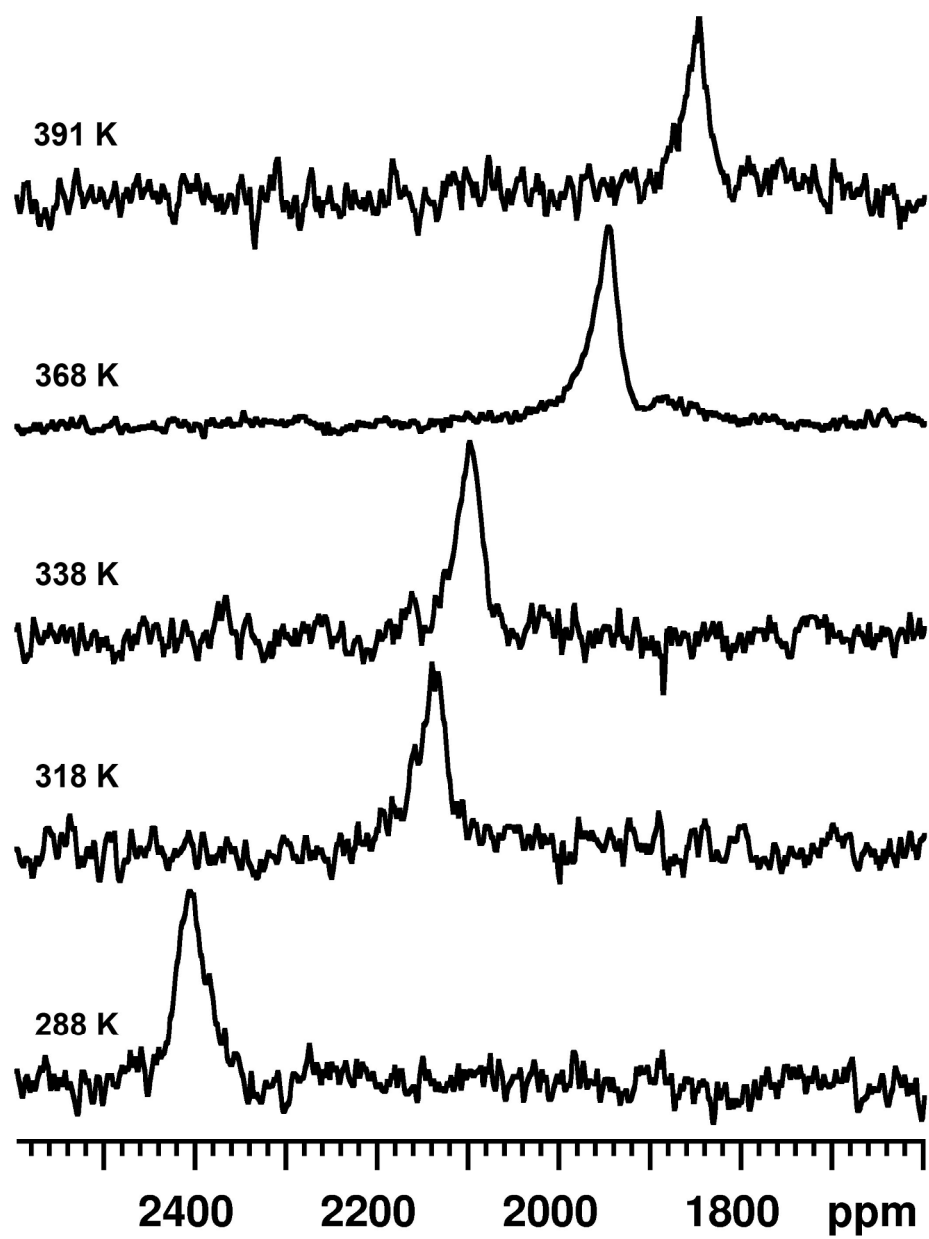

**Figure S4.**  $^{137}\text{Ba}$  MAS NMR of  $\text{Ba}_2\text{YMoO}_6$  double perovskite ranging in temperature from 288 K to 391 K.

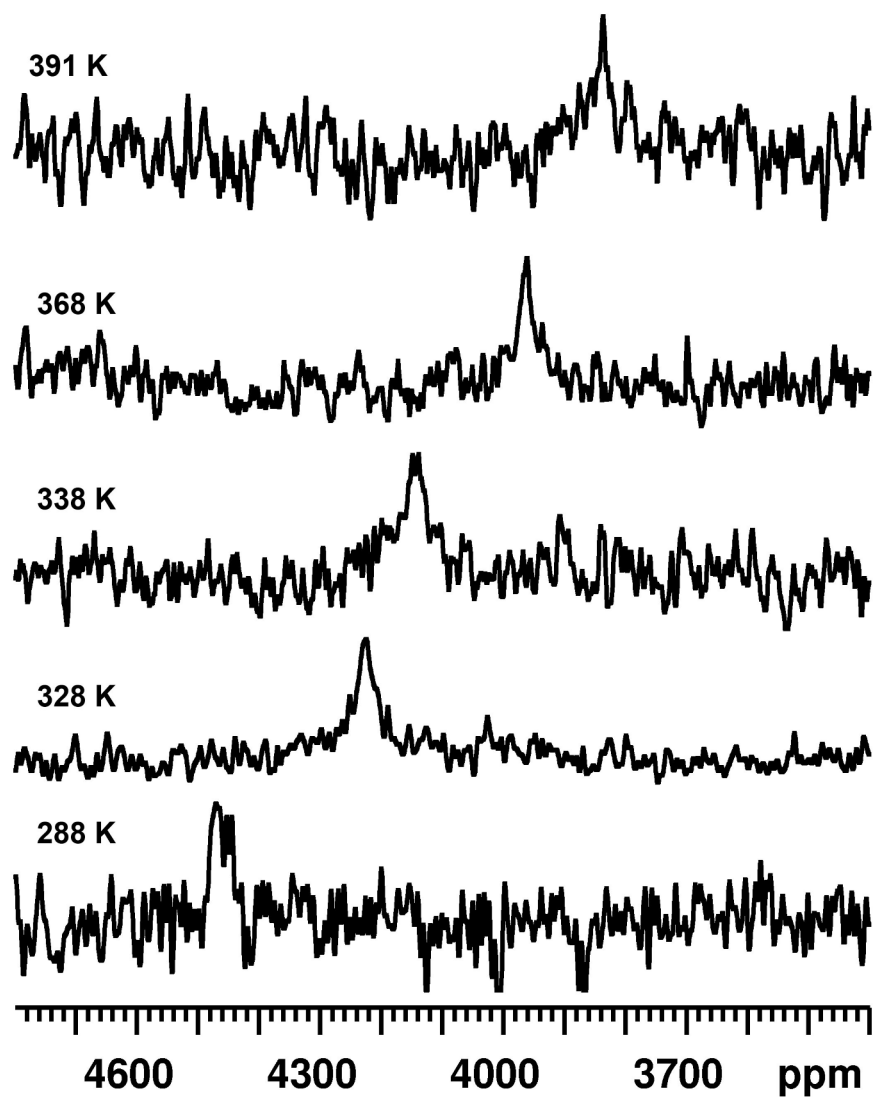

**Figure S5.**  $^{137}\text{Ba}$  MAS NMR of  $\text{Ba}_2\text{YReO}_6$  double perovskite ranging in temperature from 288 K to 391 K.

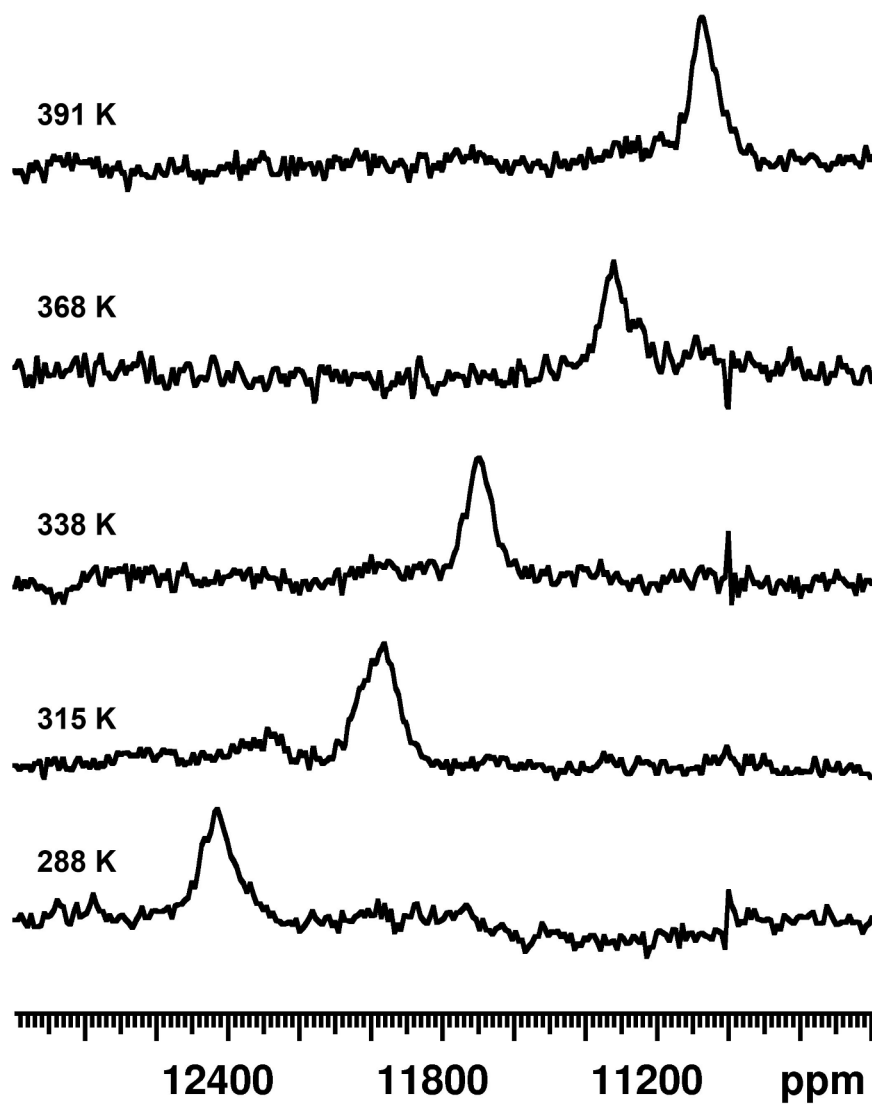

**Figure S6.**  $^{137}\text{Ba}$  MAS NMR of  $\text{Ba}_2\text{YRuO}_6$  double perovskite ranging in temperature from 288 K to 391 K. (The signal at 11100 ppm is an artifact caused by the transmitter.)
